# Supplementary material
Source: publisher figshare collection journal article supplement (https://acs.figshare.com/ndownloader/files/17385458)
Supplement: Supplementary file 1 [file 17385458]

# Identification of a Biomarker Panel for Early Detection of Lung Cancer Patients.

Bethany Geary<sup>1,2</sup>, Michael J. Walker<sup>2</sup>, Joseph T. Snow<sup>2,3</sup>, David C. H. Lee<sup>1</sup>, Maria Pernemalm<sup>4</sup>, Saeedeh Maleki-Dizaji<sup>2</sup>, Narges Azadbakht<sup>2</sup>, Sophia Apostolidou<sup>5</sup>, Julie Barnes<sup>6</sup>, Piotr Krysiak<sup>7</sup>, Rajesh Shah<sup>7</sup>, Richard Booton<sup>8</sup>, Caroline Dive<sup>9,10</sup>, Philip A Crosbie<sup>1,5,8</sup>, Anthony D. Whetton<sup>1,3,10, \*</sup>

<sup>1</sup> Stoller Biomarker Discovery Centre, Institute of Cancer Sciences, Faculty of Medical and Human Sciences, University of Manchester, Manchester, United Kingdom

<sup>2</sup> Stem cell and leukaemia proteomics laboratory, Institute of Cancer Sciences, Faculty of Medical and Human Sciences, University of Manchester, Manchester, United Kingdom

<sup>3</sup> Department of Earth Sciences, University of Oxford, Oxford, United Kingdom.

<sup>4</sup> Science for Life Laboratory, Department of Oncology and Pathology, Karolinska Institutet, Stockholm, Sweden.

<sup>5</sup> Gynaecological Cancer Research Centre, Department of Women's Cancer, Institute for Women's Health, University College London, London, United Kingdom

<sup>6</sup> Abcodia, Cambourne, Cambridgeshire, United Kingdom

<sup>7</sup> Department of Thoracic Surgery, Wythenshawe Hospital, Manchester University NHS Foundation Trust, United Kingdom

<sup>8</sup> North West Lung Centre, Wythenshawe Hospital, Manchester University NHS Foundation Trust, United Kingdom

<sup>9</sup> Clinical and Experimental Pharmacology Group, Cancer Research UK Manchester Institute, University of Manchester, Manchester, United Kingdom

<sup>10</sup> Cancer Research UK Lung Cancer Centre of Excellence

\* Corresponding author: Anthony D. Whetton [tony.whetton@manchester.ac.uk](mailto:tony.whetton@manchester.ac.uk) +44 (0)161 2756267

## Contents

## Supplemental tables

|                                                                                                                                    |   |
|------------------------------------------------------------------------------------------------------------------------------------|---|
| Contents.....                                                                                                                      | 1 |
| Table S1. IPA analysis of proteins with higher abundance in the cancer draining vein compared to the non-cancer draining vein..... | 2 |
| Table S2. IPA analysis of proteins with higher abundance in the cancer draining vein compared to the artery. ....                  | 2 |
| Table S3. IPA analysis of proteins with significant differential abundance in patients within 1 year of cancer diagnosis .....     | 3 |

**Table S1. IPA analysis of proteins with higher abundance in the cancer draining vein compared to the non-cancer draining vein.**

| <b>Associated network functions</b>                                          | <b>Number of associated proteins</b> |
|------------------------------------------------------------------------------|--------------------------------------|
| Cardiovascular System Development and Function, Cellular Movement, Cancer    | 26                                   |
| Lipid Metabolism, Small Molecule Biochemistry, Cardiovascular Disease        | 22                                   |
| Cellular Movement, Cellular Development, Tissue Development                  | 17                                   |
| Cancer, Cardiovascular Disease, Cell Death and Survival                      | 2                                    |
| Cardiovascular Disease, Cell Death and Survival, Connective Tissue Disorders | 2                                    |
| <b>Top diseases and disorders</b>                                            | <b>p value</b>                       |
| Cancer                                                                       | 0.048                                |
| Organismal injury and abnormalities                                          | 0.048                                |
| Inflammatory disease                                                         | 0.030                                |
| Respiratory disease                                                          | 0.048                                |
| Endocrine system disorders                                                   | 0.048                                |

**Table S2. IPA analysis of proteins with higher abundance in the cancer draining vein compared to the artery.**

| <b>Associated network functions</b>                                                                            | <b>Number of associated proteins</b> |
|----------------------------------------------------------------------------------------------------------------|--------------------------------------|
| RNA Damage and Repair, Inflammatory Response, Cell Cycle                                                       | 20                                   |
| Inflammatory Response, Organismal Injury and Abnormalities, Cell Death and Survival                            | 15                                   |
| Cardiovascular System Development and Function, Embryonic Development, Nervous System Development and Function | 2                                    |
| Cancer, Cell Death and Survival, Cellular Development                                                          | 2                                    |
| Cellular Movement, Hematological System Development and Function, Cancer                                       | 2                                    |
| <b>Top diseases and disorders</b>                                                                              | <b>p value</b>                       |
| Cancer                                                                                                         | 0.049                                |
| Cardiovascular disease                                                                                         | 0.037                                |
| Connective tissue disorders                                                                                    | 0.038                                |
| Dermatological diseases and conditions                                                                         | 0.049                                |
| Endocrine system disorders                                                                                     | 0.043                                |

**Table S3. IPA analysis of proteins with significant differential abundance in patients within 1 year of cancer diagnosis**

| <b>Associated network functions</b>                                                              | <b>Number of associated proteins</b> |
|--------------------------------------------------------------------------------------------------|--------------------------------------|
| Organismal Survival, Dermatological Diseases and Conditions, Organismal Injury and Abnormalities | 37                                   |
| Cellular Movement, Cellular Development, Cellular Growth and Proliferation                       | 24                                   |
| Cellular Growth and Proliferation, Cell Cycle, Cellular Movement                                 | 18                                   |
| Cancer, Organismal Injury and Abnormalities, Cell Death and Survival                             | 14                                   |
| RNA Post-Transcriptional Modification, Connective Tissue Disorders, Developmental Disorder       | 2                                    |
| <b>Top diseases and disorders</b>                                                                | <b><i>p</i> value</b>                |
| Organismal injury and abnormalities                                                              | 0.006                                |
| Gastrointestinal disease                                                                         | 0.013                                |
| Connective tissue disorders                                                                      | 0.014                                |
| Dermatological diseases and conditions                                                           | 0.014                                |
| Developmental disorder                                                                           | 0.014                                |
